# Supplementary material for: Experimental chemical budgets of OH, HO 2 and RO 2 radicals in rural air in West-Germany during the JULIAC campaign 2019
Source: Copernicus journal article supplement (doi:10.5194/egusphere-2022-820), 2022-08-31
Supplement: Supplementary file 1 [file egusphere-2022-820-supplement.pdf]

**Supplementary Information to “Experimental chemical budgets  
of OH, HO<sub>2</sub> and RO<sub>2</sub> radicals in rural air in West-Germany  
during the JULIAC campaign 2019”**

Changmin Cho<sup>1</sup>, Hendrik Fuchs<sup>1</sup>, Andreas Hofzumahaus<sup>1</sup>, Frank Holland<sup>1</sup>, William J. Bloss<sup>3</sup>,  
Birger Bohn<sup>1</sup>, Hans-Peter Dorn<sup>1</sup>, Marvin Glowania<sup>1</sup>, Thorsten Hohaus<sup>1</sup>, Lu Liu<sup>1</sup>, Paul S.  
Monks<sup>2</sup>, Doreen Niether<sup>1</sup>, Franz Rohrer<sup>1</sup>, Roberto Sommariva<sup>2,3</sup>, Zhaofeng Tan<sup>1</sup>, Ralf Tillmann<sup>1</sup>,  
Astrid Kiendler-Scharr<sup>1</sup>, Andreas Wahner<sup>1</sup>, and Anna Novelli<sup>1</sup>

<sup>1</sup>Forschungszentrum Jülich, Institute of Energy and Climate Research: Troposphere (IEK-8), Jülich,  
Germany

<sup>2</sup>Department of Chemistry, University of Leicester, Leicester, UK

<sup>3</sup>School of Geography, Earth and Environmental Sciences, University of Birmingham, Birmingham, UK

*Correspondence to:* Hendrik Fuchs (h.fuchs@fz-juelich.de) and Anna Novelli (a.novelli@fz-juelich.de)

**Table S1.** HO<sub>2</sub> and RO<sub>2</sub> background signals converted into apparent ambient concentrations used in the evaluation of HO<sub>2</sub> and RO<sub>2</sub> measurements. The average background signals originate from the reference experiments in the chamber while the upper limits are obtained from calibrations.

|        | HO <sub>2</sub><br>background<br>10 <sup>7</sup> cm <sup>-3</sup> | HO <sub>2</sub><br>background<br>upper limit<br>10 <sup>7</sup> cm <sup>-3</sup> | RO <sub>2</sub><br>background<br>10 <sup>7</sup> cm <sup>-3</sup> | RO <sub>2</sub><br>background<br>upper limit<br>10 <sup>7</sup> cm <sup>-3</sup> |
|--------|-------------------------------------------------------------------|----------------------------------------------------------------------------------|-------------------------------------------------------------------|----------------------------------------------------------------------------------|
| Winter | 0.4±0.6                                                           | 1.2                                                                              | 0.5±0.2<br>2.8±0.4 <sup>a</sup>                                   | 2.8                                                                              |
| Spring | 1.0±0.15                                                          | 2.0                                                                              | 0.5±0.2                                                           | 2.5                                                                              |
| Summer | 1.0±0.6                                                           | 2.1                                                                              | 2.8±0.5                                                           | 5.4                                                                              |
| Autumn | 0.0±0.4                                                           | 1.5                                                                              | 0.0±0.4                                                           | 1.5                                                                              |

<sup>a</sup> Variable background signals that are equivalent to RO<sub>2</sub> concentrations: from 14 Jan. to 25 Jan.:  $(0.5 \pm 0.2) \times 10^7 \text{ cm}^{-3}$ , from 26 Jan. to 6 Feb.:  $(1.6 \pm 0.2) \times 10^7 \text{ cm}^{-3}$ , from 07 Feb. to 10 Feb.:  $(2.8 \pm 0.4) \times 10^7 \text{ cm}^{-3}$ .

**Table S2.** List of the used VOCs for the radical budget analysis.

| Classification | Species                                                                                                                                                                                                                                                              | Instrument        |
|----------------|----------------------------------------------------------------------------------------------------------------------------------------------------------------------------------------------------------------------------------------------------------------------|-------------------|
| alkenes        | pentene, hexene                                                                                                                                                                                                                                                      | VOCUS- PTR-TOF-MS |
| aromatics      | toluene, xylene, benzene, phenol, furan, styrol, cresol                                                                                                                                                                                                              | PTR-TOF-MS        |
| BVOCs          | isoprene, monoterpenes, sesquiterpenes                                                                                                                                                                                                                               | VOCUS- PTR-TOF-MS |
| OVOCs          | acetaldehyde, acetone, acetonitrile, acrolein, adipinic acid, benzaldehyde, butanone, cyclohexanone, formic acid, glycolaldehyde, glycolic acid, hydroxyacetone, methylglyoxal, methyl vinyl ketone, methacrolein, nopinone, pentanone, pinonaldehyde, succinic acid | VOCUS- PTR-TOF-MS |

36 **Table S3.** Meteorological and trace gas conditions during the specific period for Case 1 and 2.

| Parameter                                                                      | Case 1 (05.08 - 08.08.2019) |               | Case 2 (22.08 - 31.08.2019) |               |
|--------------------------------------------------------------------------------|-----------------------------|---------------|-----------------------------|---------------|
|                                                                                | Median                      | Interquartile | Median                      | Interquartile |
| SAPHIR                                                                         |                             |               |                             |               |
| temperature (°C)                                                               | 27.0                        | 7.8           | 31.0                        | 9.1           |
| H <sub>2</sub> O (%)                                                           | 1.44                        | 0.25          | 1.4                         | 0.5           |
| OH (10 <sup>6</sup> cm <sup>-3</sup> )                                         | 4.5                         | 5.2           | 4.1                         | 5.7           |
| HO <sub>2</sub> (10 <sup>8</sup> cm <sup>-3</sup> )                            | 1.4                         | 1.4           | 2.7                         | 3.8           |
| RO <sub>2</sub> (10 <sup>8</sup> cm <sup>-3</sup> )                            | 2.1                         | 2.6           | 2.9                         | 3.1           |
| O <sub>3</sub> (ppbv)                                                          | 37.5                        | 11.3          | 57.5                        | 37.6          |
| NO (ppbv)                                                                      | 0.26                        | 0.39          | 0.22                        | 0.54          |
| NO <sub>2</sub> (ppbv)                                                         | 3.4                         | 2.2           | 4.3                         | 4.6           |
| CO (ppmv)                                                                      | 0.12                        | 0.01          | 0.16                        | 0.03          |
| HCHO (ppbv)                                                                    | 1.8                         | 0.7           | 3.4                         | 1.8           |
| HONO (ppbv)                                                                    | 0.18                        | 0.09          | 0.21                        | 0.15          |
| <i>k</i> <sub>OH</sub> (s <sup>-1</sup> )                                      | 5.2                         | 1.1           | 8.7                         | 3.4           |
| <i>k</i> <sub>VOC</sub> (s <sup>-1</sup> )                                     | 3.3                         | 0.9           | 5.7                         | 3.4           |
| Total aerosol surface area (10 <sup>7</sup> nm <sup>2</sup> cm <sup>-3</sup> ) | 8.5                         | 2.5           | 11.2                        | 11.7          |

37

38

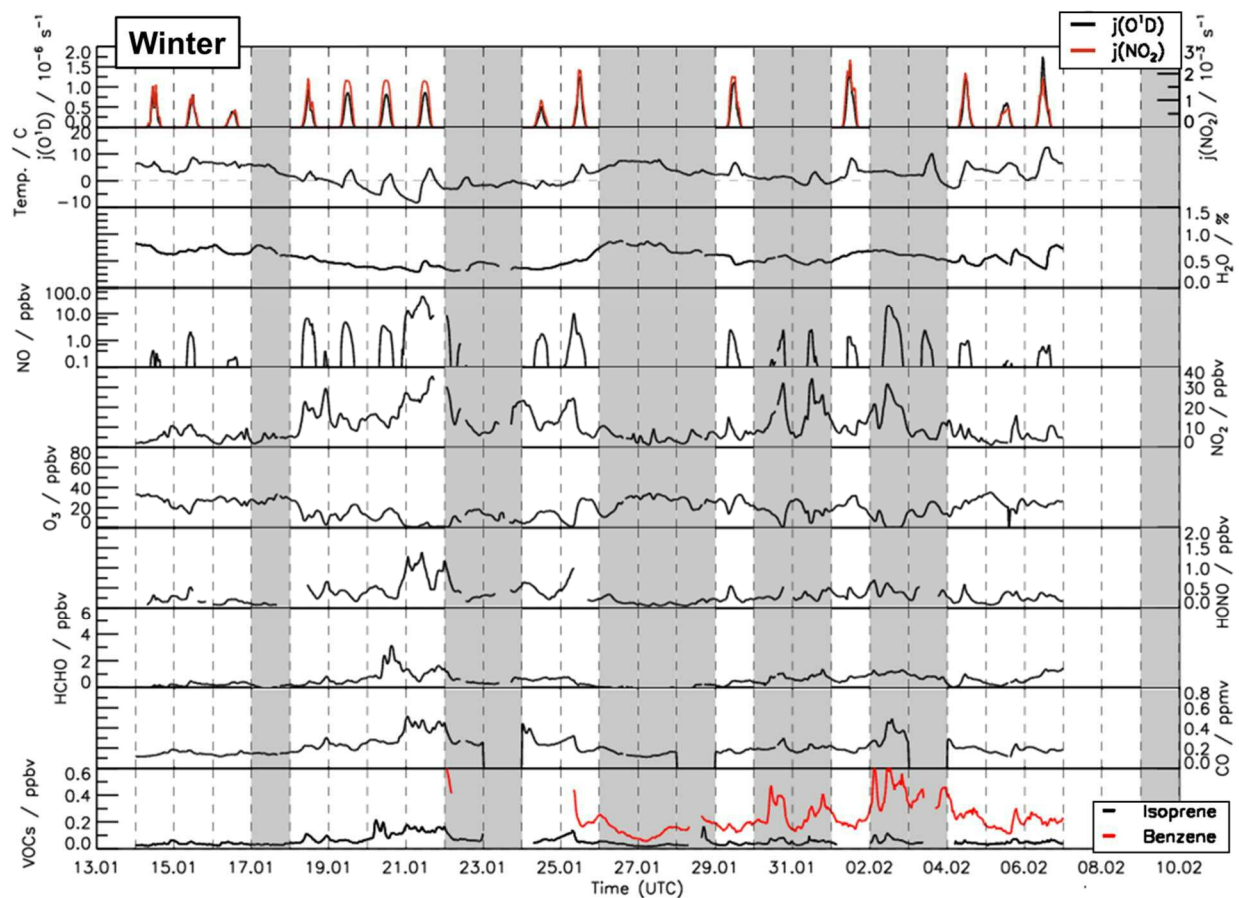

**Figure S1:** Time series of temperature and trace gas concentrations during the winter period of the JULIAC campaign (Cho et al., 2022). Vertical dashed lines denote midnight. Grey shaded areas indicate calibration days, when no measurements were done and days when the chamber roof was closed due to bad weather conditions.

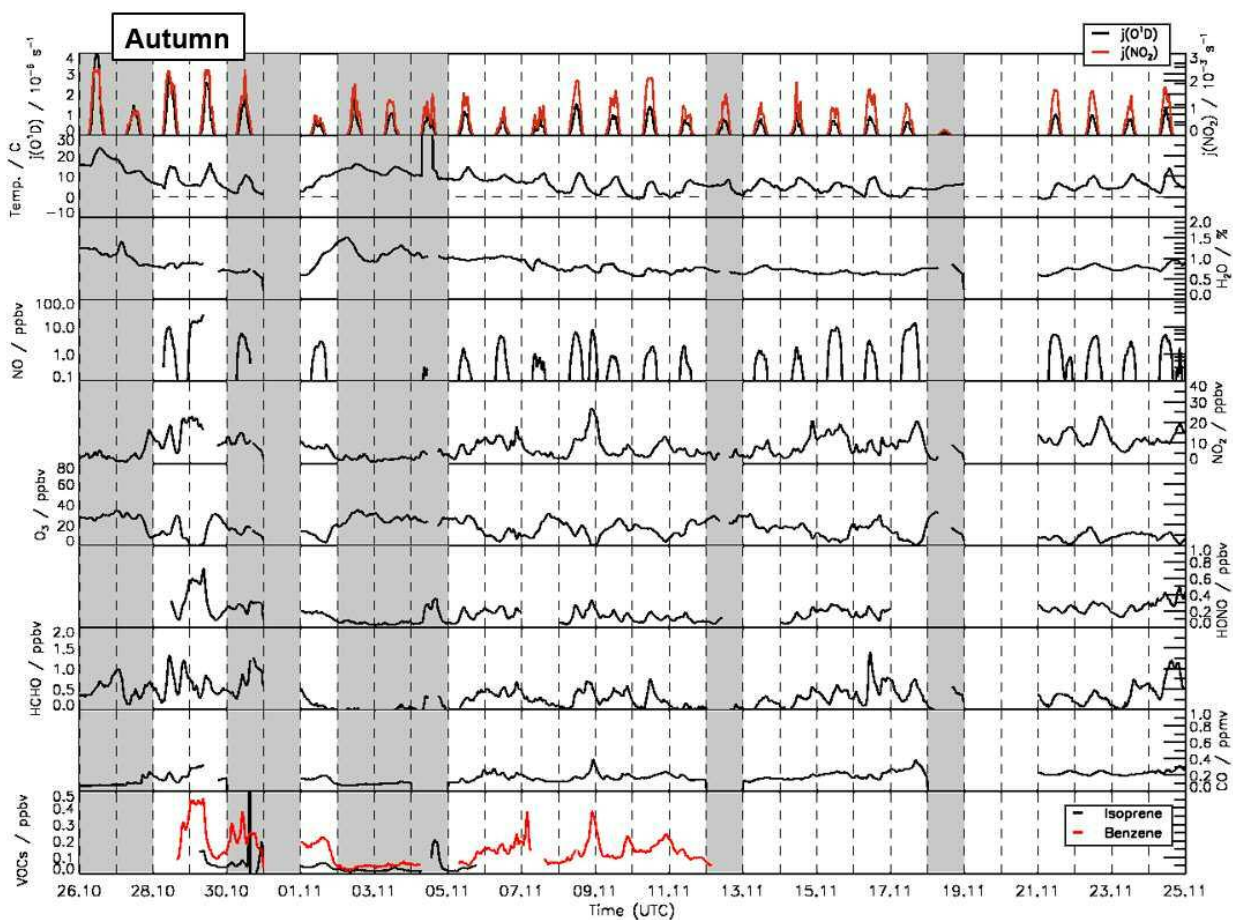

**Figure S2:** Time series of temperature and trace gas concentrations during the autumn period of the JULIAC campaign (Cho et al., 2022). Vertical dashed lines denote midnight. Grey shaded areas indicate calibration days, when no measurements were done and days when the chamber roof was closed due to bad weather conditions.

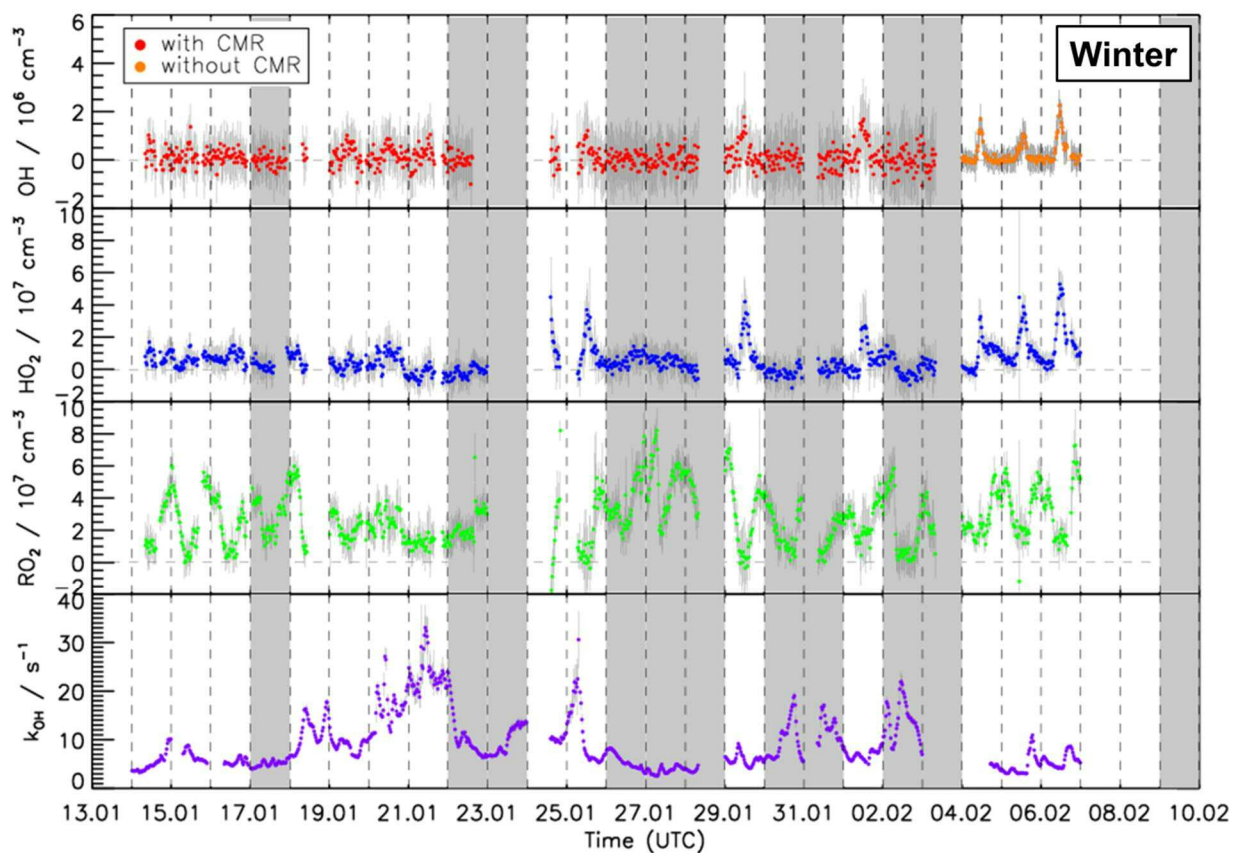

**Figure S3:** Time series of OH, HO<sub>2</sub>, and RO<sub>2</sub> radical concentration measured by the FZJ-LIF-CMR instrument and measurements of the OH reactivity ( $k_{\text{OH}}$ ) measured in the winter period of the JULIAC campaign (Cho et al., 2022). Vertical dashed lines denote midnight. Grey shaded areas indicate calibration days when no measurements were done and days when the chamber roof was closed due to bad weather conditions.

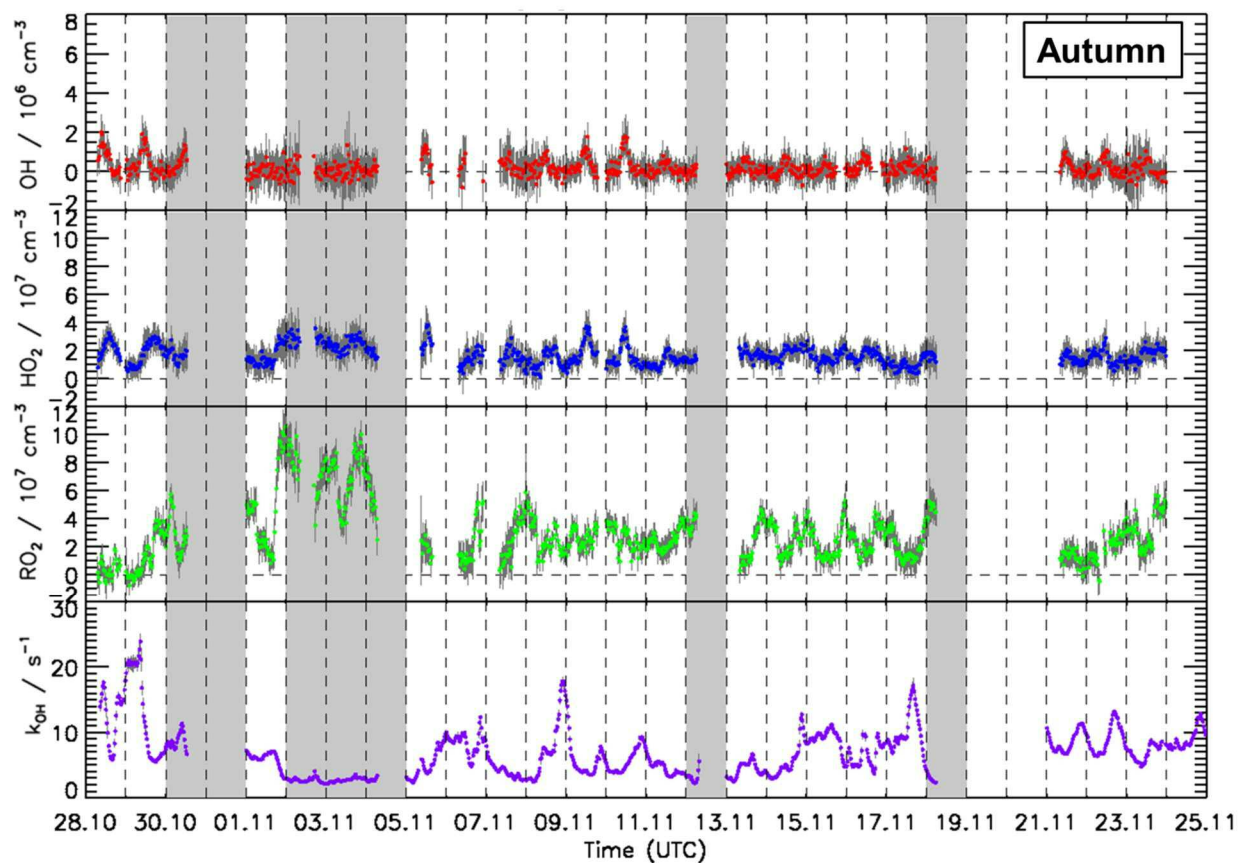

55 **Figure S4:** Time series of OH, HO<sub>2</sub>, and RO<sub>2</sub> radical concentration measured by the FZJ-LIF-CMR  
 56 instrument and measurements of the OH reactivity ( $k_{OH}$ ) measured in the autumn period of the JULIAC  
 57 campaign (Cho et al., 2022). Vertical dashed lines denote midnight. Grey shaded areas indicate  
 58 calibration days when no measurements were done and days when the chamber roof was closed due to  
 59 bad weather conditions.



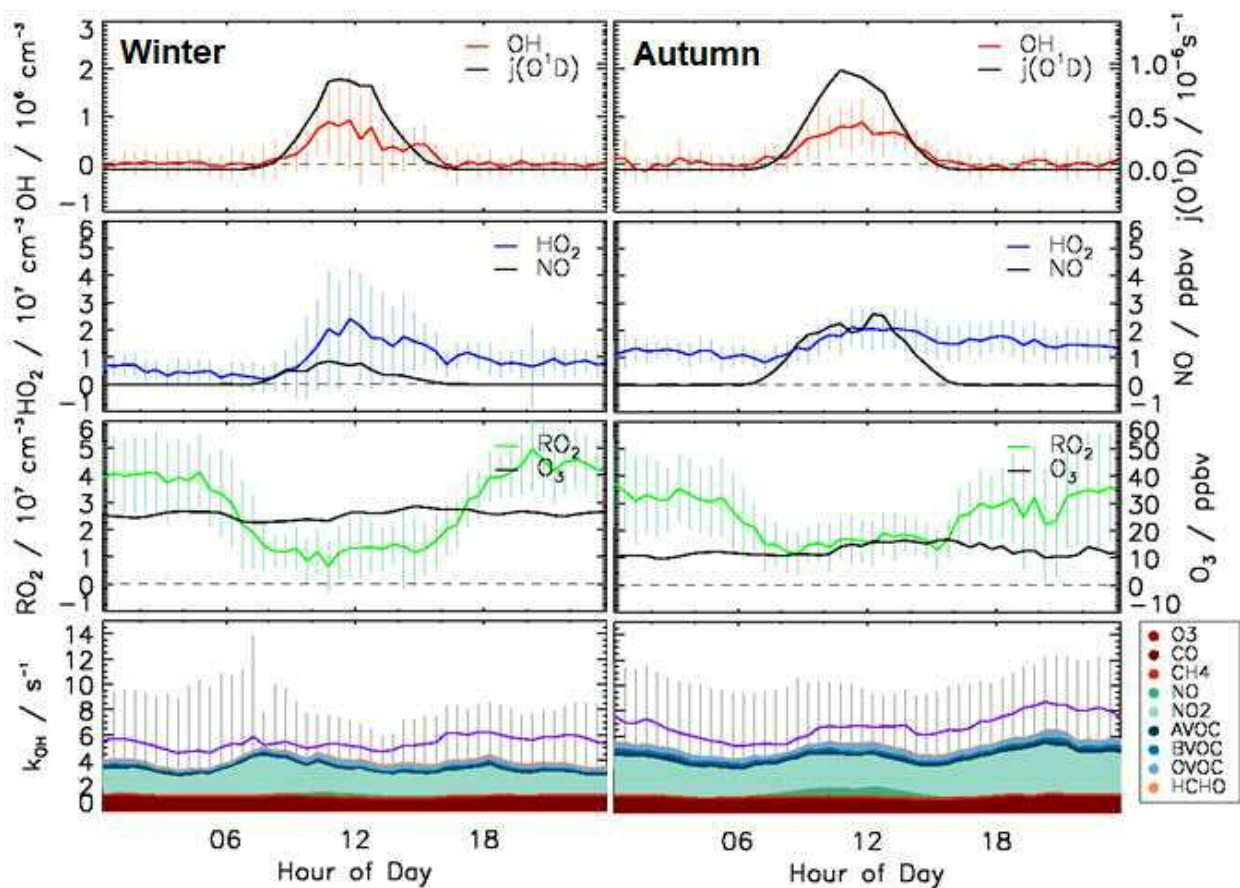

60 **Figure S5:** Median values of the diurnal profiles of OH, HO<sub>2</sub>, RO<sub>2</sub>,  $k_{\text{OH}}$ ,  $j(\text{O}^1\text{D})$ , NO, O<sub>3</sub> measured in the  
 61 winter and autumn periods of the JULIAC campaign. Colored areas represent the contributions of  
 62 measured reactants to the total OH reactivity. Vertical lines give 25<sup>th</sup> and 75<sup>th</sup> percentile values.

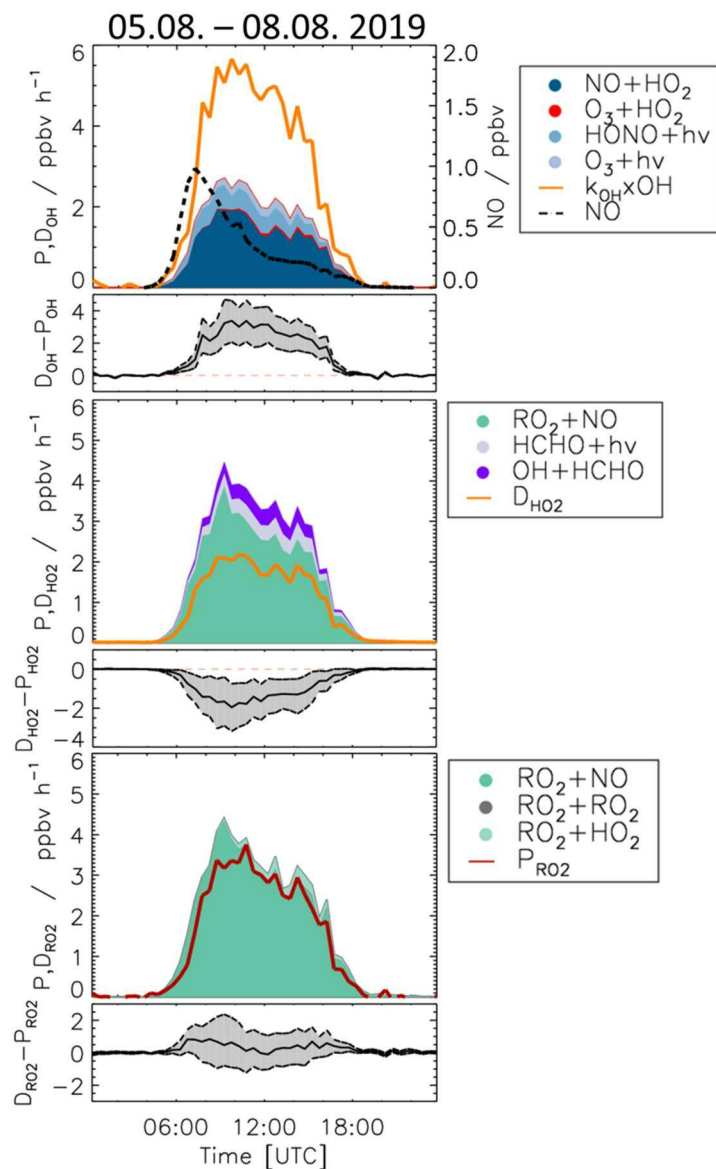

**Figure S6:** Chemical budgets for OH, HO<sub>2</sub>, and RO<sub>2</sub> radicals similar to Figure 12 (only Case 1), using the lower limit of the reaction rate coefficient of the reaction of RO<sub>2</sub> with NO,  $7.7 \times 10^{-12} \text{ cm}^3 \text{ s}^{-1}$  (at 298 K for CH<sub>3</sub>O<sub>2</sub>) to calculate the turnover rate of this reaction.

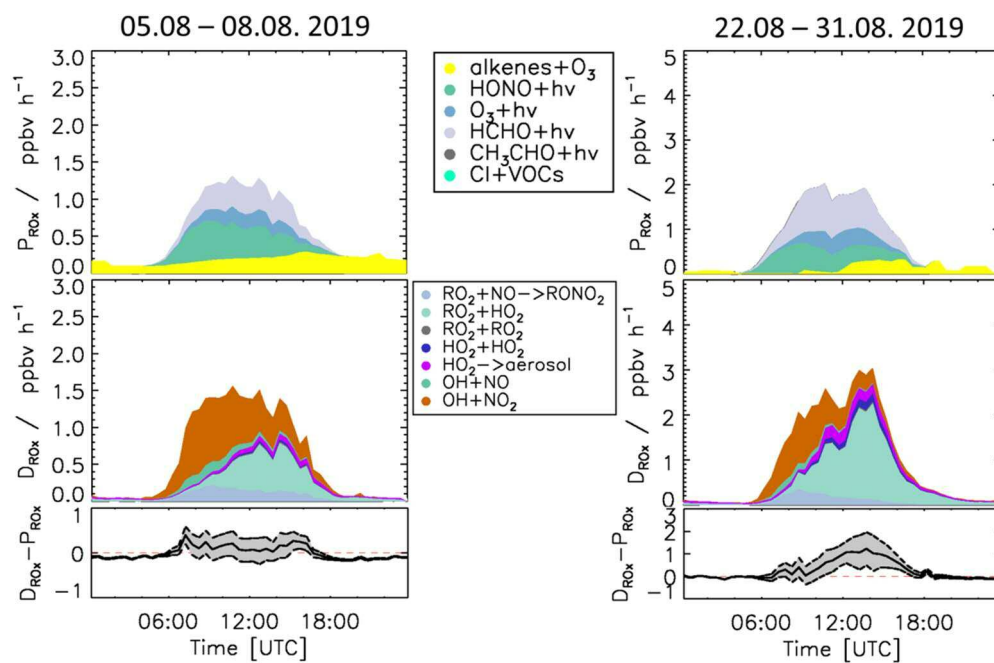

**Figure S7:** Experimental budgets for RO<sub>x</sub> similar to Figure 11 (Case 1 and 2), using the high limits of alkene concentrations contributing to radical production by ozonolysis reactions and applying the HO<sub>2</sub> uptake on the aerosols (Section 4.2).
